# Supplementary material for: TIGIT+ TIM-3+ NK cells are correlated with NK cell exhaustion and disease progression in patients with hepatitis B virus‑related hepatocellular carcinoma
Source: PubMed Central journal article supplement — Oncoimmunology. 2021 Jun 28;10(1):1942673. doi: 10.1080/2162402X.2021.1942673 (PMC8244763; doi:10.1080/2162402x.2021.1942673), 2021-06-28

FigureS1.

TIGIT

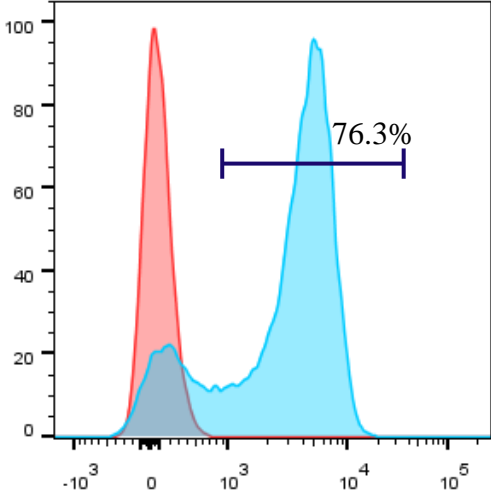

TIM-3

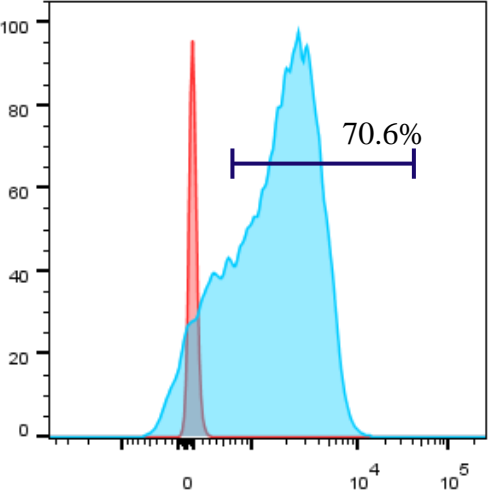

FigureS2.

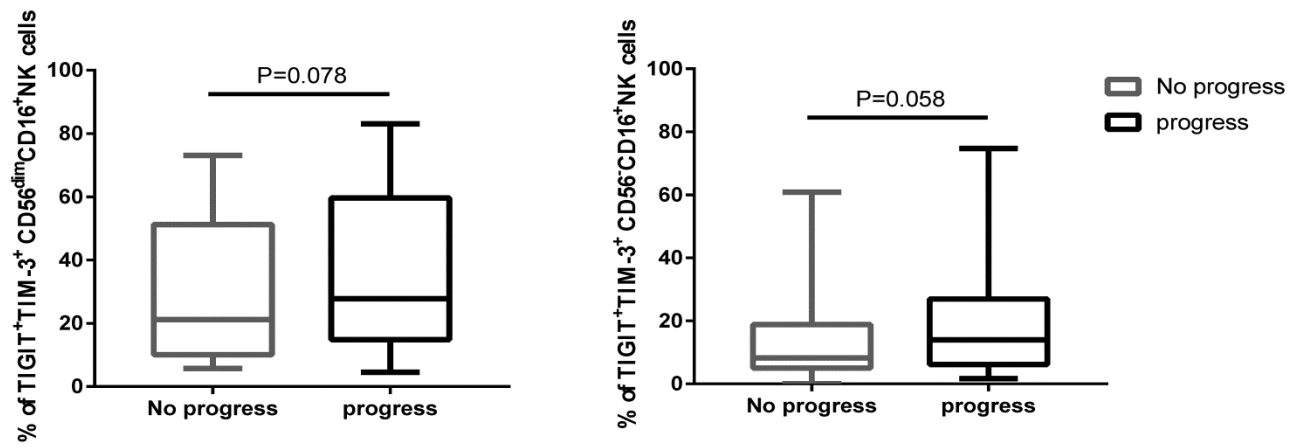

FigureS3.

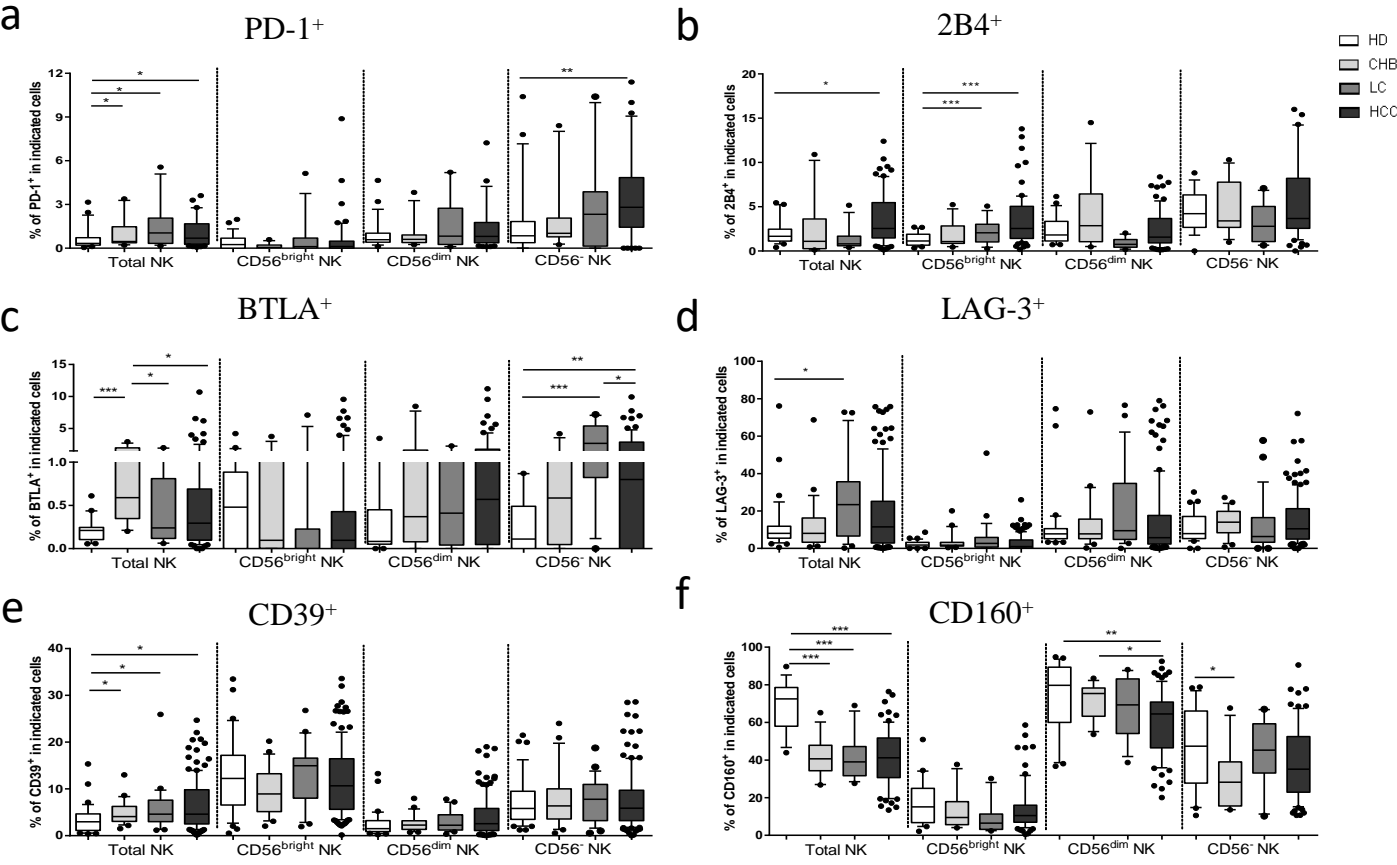

FigureS4.

**Lymphocytes**

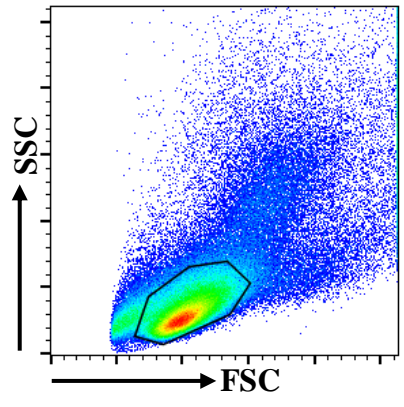

**Single Cells**

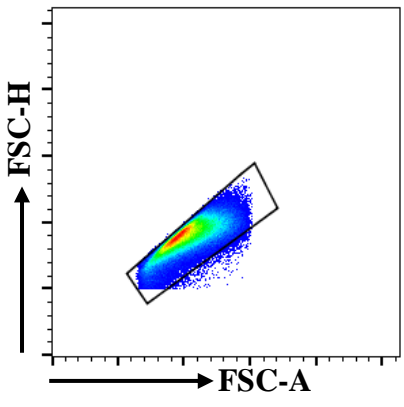

**Live CD3<sup>-</sup>**

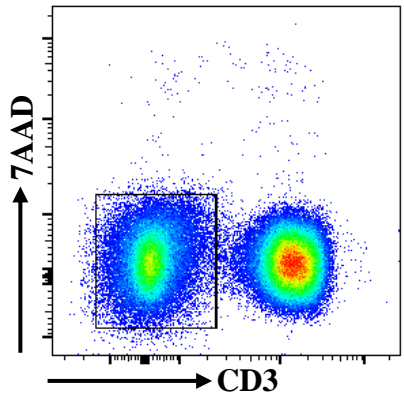

**CD19<sup>-</sup>CD14<sup>-</sup>**

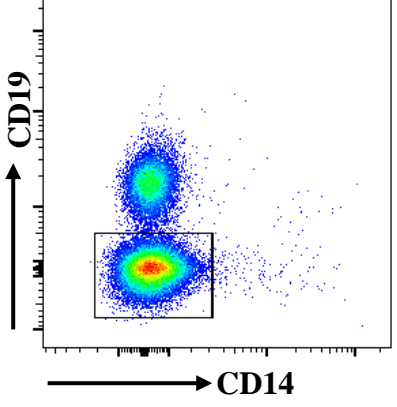

**Total NK cells**

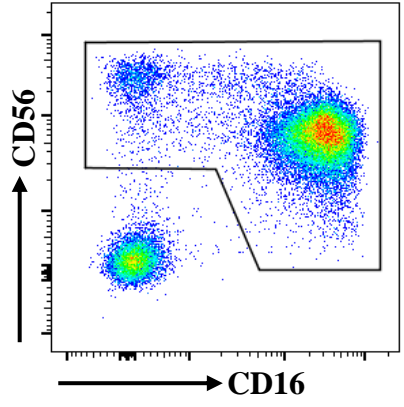

**NK cell subsets**

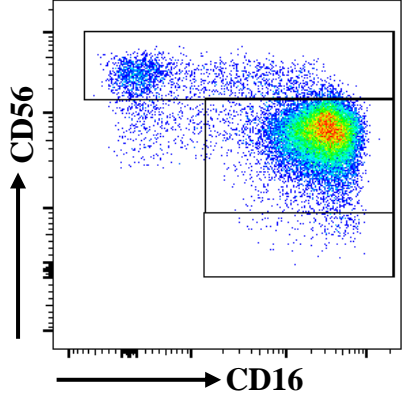

FigureS5.

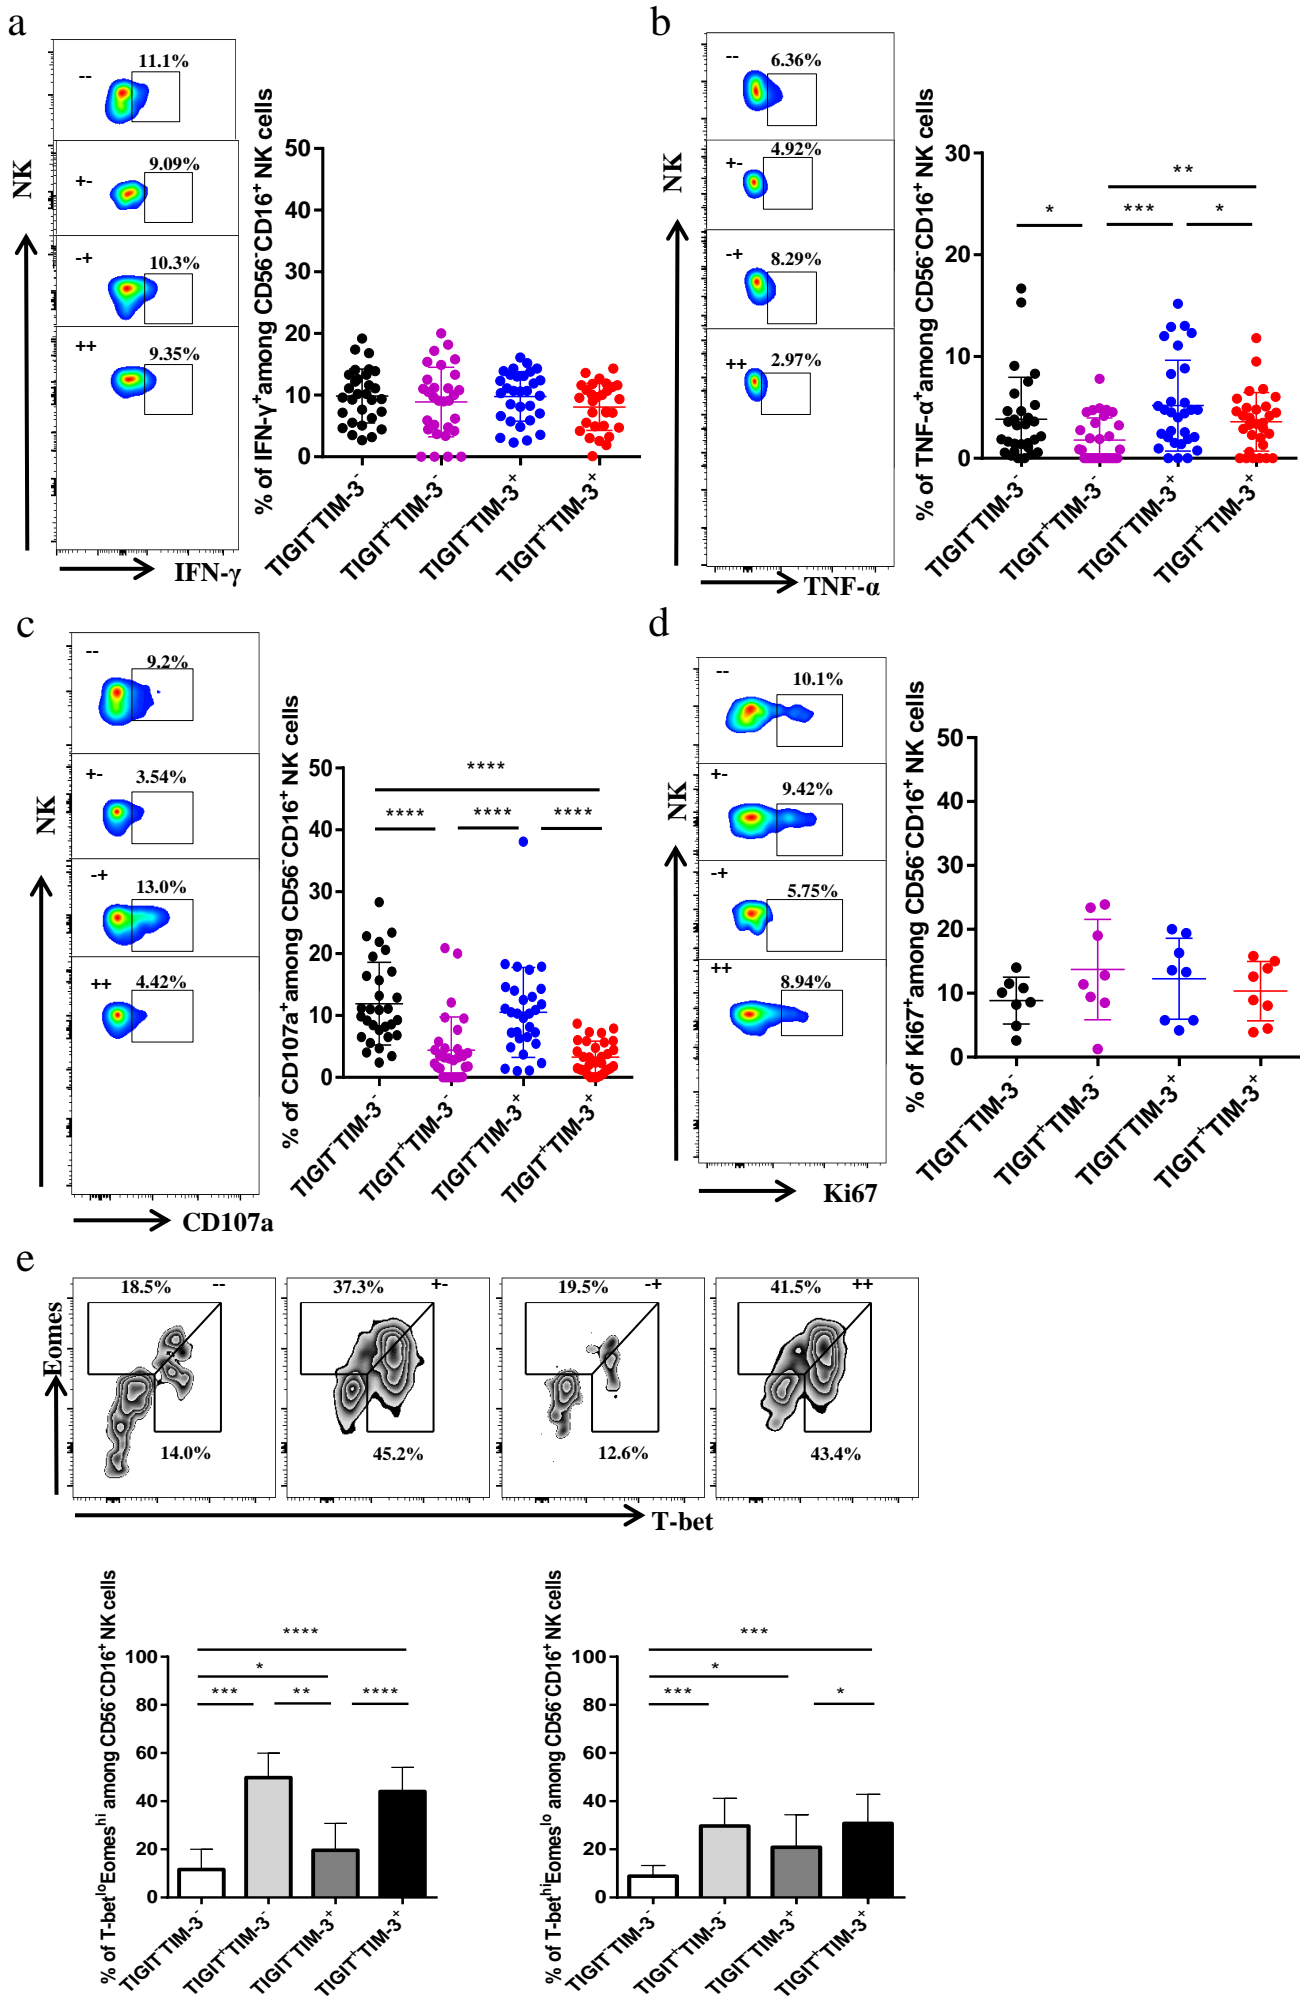

Supplement: KONI_A_1942673_SM5792.pdf [file KONI_A_1942673_SM5792.pdf]
